# Supplementary material for: Evidence for novel polycyclic aromatic hydrocarbon degradation pathways in culturable marine isolates
Source: PubMed Central journal article supplement (PMC10783047; doi:10.1128/spectrum.03409-23), 2023-12-12
Supplement: spectrum.03409-23-s0001.pdf [file spectrum.03409-23-s0001.pdf]

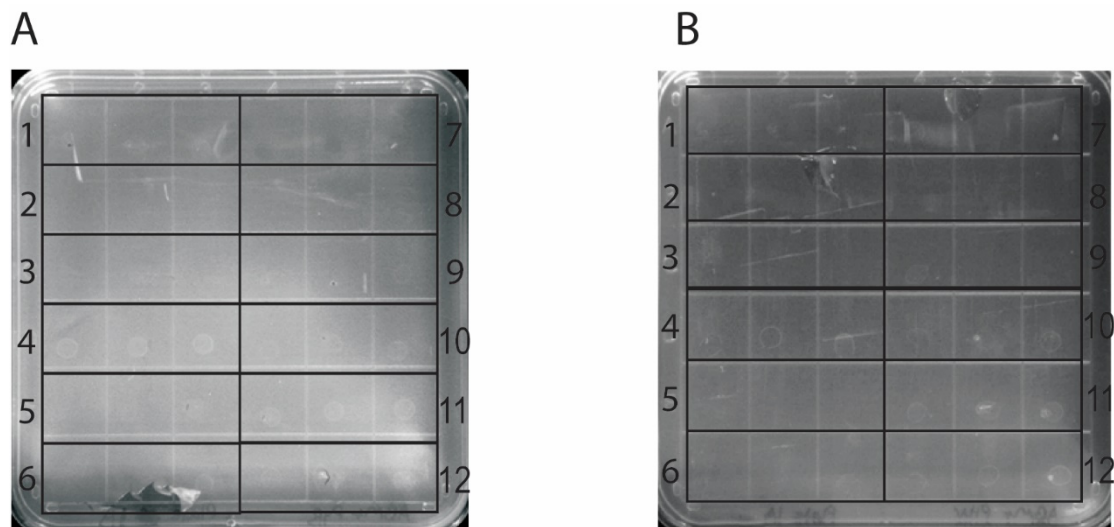

**Figure S1: Minimal medium PAH plate screening for marine strains.** (A) Pyrene top agar screening plates after 7 days of incubation. Colonies have been scraped from plates to score for clearing zones. (B) Phenanthrene top agar screening plates after 7 days of incubation. Colonies have been scraped from plates to score for clearing zones. 1) *R. pomeroyi* DSS-3, 2) *Citricella* sp. SE45, 3) *S. stellata* E-37, 4) *Bacillus-Clostridium* strain SE165, 5) *Bacillus-Clostridium* strain SE98, 6) *M. georgiense* DSM 11526, 7) *V. natriegens* ATCC 14048, 8) *Rhodospirillaceae* strain EZ35, 9) *Alcanivorax* sp. strain EZ46, 10) *A. macleodii* strain EZ55, 11) *Flavobacteriaceae* strain EZ40, and 12) *E. coli* DH5 $\alpha$ . Clearing zones appear as dark circles on the media.

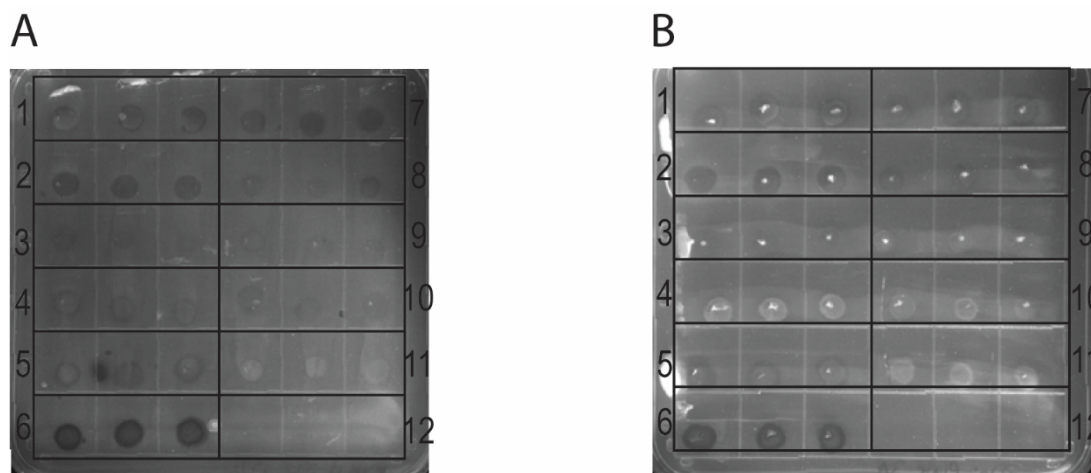

**Figure S2: Complex medium PAH plate screening for *Roseobacteraceae* strains.** A) *Roseobacteraceae* strains in pyrene top agar screening plates after 4 days of incubation. Colonies have been scraped from plates to score for clearing zones. B) *Roseobacteraceae* strains on phenanthrene top agar screening plates after 3 days of incubation. Colonies have been scraped from plates to score for clearing zones. 1) *R. pomeroyi* DSS-3, 2) *S. stellata* E-37, 3) *R. nubinihibens* ISM, 4) *Sulfitobacter* sp. EE-36, 5) *Citricella* sp. SE45, 6) Rhodobacterales strain Y4I, 7) *Ruegeria* sp. TM1040, 8) *Roseovarius* sp. 217, 9) *Sulfitobacter* sp. NAS-14.1, 10) *S. pontiacus* CB-D, 11) *E. coli* DH5 $\alpha$ , and 12) None. Clearing zones appear as dark circles on the media.

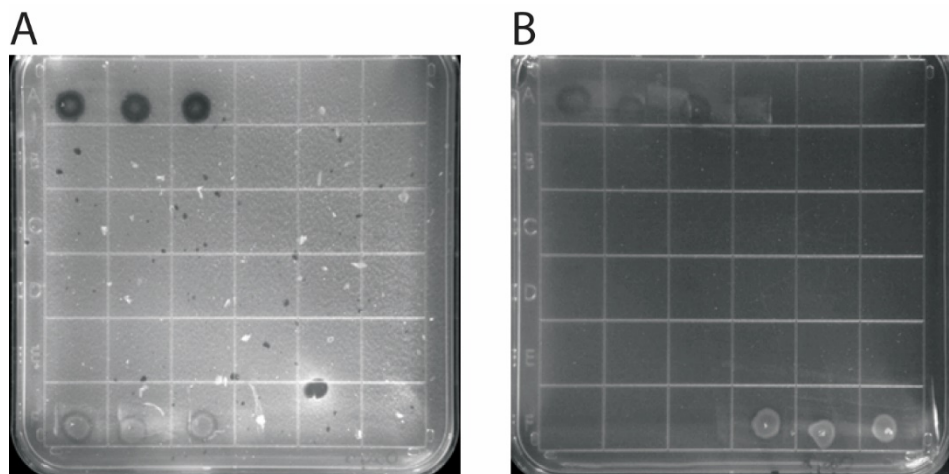

**Figure S3: Rhodobacterales strain Y4I and *igiD* pyrene and phenanthrene screening.** Wild type Y4I is shown on the top of the plate and the *igiD* mutant strain is shown on the bottom of the plate. A) Pyrene top agar screening plate and B) Phenanthrene top agar screening plate after 5 days of incubation.

Rhodobacterales strain Y41  
*Roseovarius* sp. 217  
*Roseovarius nubinihibens* ISM  
*Ruegeria pomeroyi* DSS-3  
*Sagittula stellata* E-37  
*Roseovarius* sp. 217  
*Sulfitobacter pontiacus* CB-D  
*Sulfitobacter* sp. EE-36  
*Sulfitobacter* sp. NAS-14.1  
*Citricella* sp. SE45  
*Ruegeria* sp. TM1040  
*Citricella* sp. SE45  
*Ruegeria pomeroyi* DSS-3  
*Roseovarius nubinihibens* ISM  
*Roseovarius nubinihibens* ISM  
*Roseovarius* sp. 217  
*Ruegeria pomeroyi* DSS-3  
*Pseudomonas aeruginosa* PaK1  
Clustal Consensus

```

      10      20      30      40      50      60      70
.....|.....|.....|.....|.....|.....|.....|
-----MFKGSM PALVTPFS-----NGELDL DALKRIV EWQIA-EGSNALV PVGTTSES
-----MRTAMTPIFRFDGIYTPVITPYNA-----DGSVNH DALS DVI EHLIA-AGVBGIIISGSGSTGEN
-----MTNRFDRBAQGVYIIAATPFPAE-----DGSLDLESTDRMVD FYLD-CGVTGM IILGIMSEA
-----MFKGSM PALVTPFS-----NGELDL EALKRIV EWQIG-EGSTGIV PVGTTSES
-----MFKGSM PALVTPFK-----DGAVDFE TLKQLVD WHDV-QGSHGLV PVGTTSES
-----MKKDVFHGTIPALLTPCTP-----DRKPDF DALVRKQ QEMIA-AGMSGV VYVCGSCGDW
-----MLQGS L PALVTPFT-----DGALDLATLKKLV EWHIA-EGSNGI V PVGTTSES
-----MLQGS L PALVTPFT-----DGALDLATLKKLV EWHIA-EGSNGI V PVGTTSES
-----MLQGS L PALVTPFT-----DGALDLATLKKLV EWHIA-EGSNGI V PVGTTSES
-----MKTPLTGILPVAPTPFHD-----DGRIDPEGM CRVLD CMID-QGVD AICILIANSEQ
-----MKT TNWSVPMFKGSM PALVTPFR-----NGELDL TLKHLV EWHIA-EGSTGIV PVGTTSES
-----MLKGS MPALVTPFK-----DGAVDFD TLKRLV EWHVA-EGSHGIV PVGTTSES
-----MSTRYTG IWPVAPTPFHD-----DGSLDL DGMKRVLD CLID-QGADGICILIANSEQ
-----MLKGS L PALVTPFK-----NGALD VDTLKH LV EWHIN-QGSHGIV PVGTTSES
-----MT-----LEGIYTPVVTPLHD-----DPSVDY DALAD VVDHLVA-SGVHGLISGSGSTGEN
-----MDVETLKKLV EWHIG-EGSHGIV PVGTTSES
-----MRGIWAAALNPFPAE-----DLSFDEAGFRNRIRHWVDD LGIEGLFTICGKQSEF
MSNKIMKTSRLTAEDINGAWTITMPTPSTPDASDWRSTATVDLEETARIVEELIA-AGVNGI L SMGTFSEC
: * : :

```

Rhodobacterales strain Y41  
*Roseovarius* sp. 217  
*Roseovarius nubinihibens* ISM  
*Ruegeria pomeroyi* DSS-3  
*Sagittula stellata* E-37  
*Roseovarius* sp. 217  
*Sulfitobacter pontiacus* CB-D  
*Sulfitobacter* sp. EE-36  
*Sulfitobacter* sp. NAS-14.1  
*Citricella* sp. SE45  
*Ruegeria* sp. TM1040  
*Citricella* sp. SE45  
*Ruegeria pomeroyi* DSS-3  
*Roseovarius nubinihibens* ISM  
*Roseovarius nubinihibens* ISM  
*Roseovarius* sp. 217  
*Ruegeria pomeroyi* DSS-3  
*Pseudomonas aeruginosa* PaK1  
Clustal Consensus

```

      80      90      100     110     120     130     14
.....|.....|.....|.....|.....|.....|.....|
P T L T H E E H E T V I A E V V K A A A G R V P V I A G A G S N N T V E M I R F V E F A E K V G A D A A L V V T P Y Y N ---KPTQRGM
Y A Q T V Q E R V D L A R F A H A C I K G R V P L V I G T G A M L D D S I A L A Q A A R D I G A D V I L L S P P Y A ---VPTDR EN
P K L S G E E S A Q F A T R V L D R V A G R V P V I V G S G A G L D P M K A L T D R V M A A G A G V M V A P M S I Q ---TDAQKQK
P T L S H E E H E T V V A E V V K A A A G R V P V I A G A G S N N T T E A I R F V Q F A Q R I G A D A A L V V T P Y Y N ---RPTQRGL
P T L T H D E H E E V I R C V V E A A A G R I P V I A G A G S N N T D E A V R F M V Y A Q T V G A D G A L V V T P Y Y N ---KPTQAGM
P L L T D D E R ---M E G V A R L T K A G V P V V G T G A I N T K S A V A H A A H A Q K V G A A G L M V I F R V L S R G ---LSVAQR
P T L T H A E H E T V V A E V V K A A A G R I P V V A G A G S N N T T E S I R L A K H A E S V G A D A V L V V T P Y Y N ---KPTQAGL
P T L T H A E H E T V V A E V V K A A A G R I P V V A G A G S N N T T E S I R L A K H A E S V G A D A V L V V T P Y Y N ---KPTQAGL
P L L S D E E R A T L T R V S L E H V A G R V P V I V T I S A F A T A I V T A R A R E A E S L G A A M L M M P P Y H G V G L V P A E A G I
P T L T H E E H E L V I K V V V E T A A G R V P V I A G A G S N N T V E A I R F V E Y A H R V G A D A A L V V T P Y Y N ---KPTQRGM
P T L T H K E H E A V I A C V V E A V A G R I P V I A G A G S N N T D E A M R F V Q F A K T V G A D A A L V V T P Y Y N ---KPTQAGL
F L I S D A E R E T L T R L C L E H V A G R V P M I V T I S H F A T Q I A V E R A R F A K G L G A D I V M M P P Y H G A L L K G T A Q Q T
P T L S H E E H E A V V E I V V K A V N G R I P V V A G A G S N N T A E S L R F M E H A K K V G A D A A L V V T P Y Y N ---KPTQRGL
Y T Q T V E E R L E I A R F T Q R L K R L P L F V G T G M M R T E D S L A M A T G A R E M G A D G I L H G T P P Y S ---VPTREH
P T L T H Q E H E M V V E E V V R A A A G R I P V I A G A G S N N T L E G I R L M Q H A H K V G A D A A L V V T P Y Y N ---KPTQAGL
F S M S L E E R K R N L E V A V E E C A G R A G T M M S V S D Q N F D T V L E L A R H A Q D V G A N I V V H A P V L E ---FVHDRDALL
A T L T W D E K R D Y V S T I V E T I R G R V P Y P C G T T A L N T R E V I R Q T R E L I D I G A N T M L G V P M V V K ---MDLPTAV
: * : ** :

```

Rhodobacterales strain Y41  
*Roseovarius* sp. 217  
*Roseovarius nubinihibens* ISM  
*Ruegeria pomeroyi* DSS-3  
*Sagittula stellata* E-37  
*Roseovarius* sp. 217  
*Sulfitobacter pontiacus* CB-D  
*Sulfitobacter* sp. EE-36  
*Sulfitobacter* sp. NAS-14.1  
*Citricella* sp. SE45  
*Ruegeria* sp. TM1040  
*Citricella* sp. SE45  
*Ruegeria pomeroyi* DSS-3  
*Roseovarius nubinihibens* ISM  
*Roseovarius nubinihibens* ISM  
*Roseovarius* sp. 217  
*Ruegeria pomeroyi* DSS-3  
*Pseudomonas aeruginosa* PaK1  
Clustal Consensus

```

      150     160     170     180     190     200     21
.....|.....|.....|.....|.....|.....|.....|
V Q H F T A A H D C A G I P I I I Y N I P G R S - V V D M P A T M G E L A K L P R I V G V K - D A T G D L A R V S Q Q R A S C G A D F I Q
A L N A L A I D R A A N L P V M I Y N Y P G R T - G T M M G E E F L D R V G R S R N F C G I K - E S S G D I N R V H L L A R D Y - P H I Q L
Y F A Q V C Q T L G P D V P I C I Q D Y P M T T K V N F S T E T L L D I F R D N P Q I I M L K H E D W P G L N K L D R M R A E T G S D Q I D
I A H F T A L H D C A E I P I V I Y N I P G R S - V V D M P A T M G A L A K L P R I V G V K - D A T G D L A R V S Q Q R A S C G A D F I Q
I A H F K A V H D A D L P I I I Y N I P G R S - A V D M S P E T M G E L A K L P R I V G V K - D A T G D L A R V C Q R I T C G K D F T Q
N H F K A I L D A A P D V P A I T Y N S P Y Y G - Y S T K A D L F F A L R G E H K N L I G F K E F G G K N D L S Y A A E H I T S Q D D N V I
I A H F T A I H E A C G L P I I I Y N I P G R S - V V D M L P E T M A E L A K L P R I I G V K - D A T G D L A R V C D Q R M L C G P D F V Q
F E H F Q A V S D A V A I P I M V Q A P L S G - V T L T V P L L A R M A R E I G N V S Y F K - M E T P F A A D K L A A L I E A G G E H I V
I A H F S A L H D C A D I P I I I Y N I P P R S - V V D M S P A T M G E L A K L P R I I G V K - D A T G K L E R V S Q Q R A S C G A D F T Q
Y A H F K A L H D C A E I P I V I Y N I P G R S - A V D M L P A T M G E L A K L P R V I G V K - D A T G D L A R V C A Q R I T C G P D F I Q
F D Q F K A V G - E V G I P I M V Q A P L S G - V D L P V P L L V R M A Q E I D M V R L F K - I E C F R A N K L R A L I E Q G G A A I E
I A H F K T L H D A C D L P I V I Y N I P G R S - V V D M L P A T M G E L A K L P R I I G V K - D A T G D L A R V C Q Q R I T C G T D F L Q
A L N T L A V D R A A D L P M I I Y N Y P G R M - G V N M G E E F L D R V G R S R N V I G I K - E S S G D I N R V H L L A R D Y - P H I Q L
I A H F T A L H D C C D L P I I I Y N I P G R S - V V D M A P D T M K L A Q L P R I V G V K - D A T G D L A R V S A Q R I T C G K D F T Q
Y E Y Y K A I S E A V D I G I A M S H P D S G - Y L M S P E L C T R I A D L P N V V A I K ---Y S V P R E M Y A R L T E L A G D R I Q
Q Y R D V A D A V P E A A I A I Y A N P E A F - K F D F R P F W A E M S K I P Q V V T A K ---Y L G I G M L D L D I R L A P N I R F
: * : *

```

Residue; : indicates Strong Similarity; · Weak Similarity). Active and catalytic sites were derived from the CHBPH\_aldolase subfamily using the NCBI Conserved Domains Database (<https://www.ncbi.nlm.nih.gov/cdd>).

## References

1. González JM, Mayer F, Moran MA, Hodson RE, Whitman WB. 1997. *Microbulbifer hydrolyticus* gen. nov., sp. nov., and *Marinobacterium georgiense* gen. nov., sp. nov., two marine bacteria from a lignin-rich pulp mill waste enrichment community. *Int J Syst Bacteriol* 47:369–376.
2. Buchan A, Neidle EL, Moran MA. 2001. Diversity of the ring-cleaving dioxygenase gene *pcaH* in a salt marsh bacterial community. *Appl Environ Microbiol* 67:5801.
3. Morris JJ, Kirkegaard R, Szul MJ, Johnson ZI, Zinser ER. 2008. Facilitation of robust growth of *Prochlorococcus* colonies and dilute liquid cultures by “helper” heterotrophic bacteria. *Appl Environ Microbiol* 74:4530–4534.
4. Austin B, Zachary A, Colwell RR. 1978. Recognition of *Beneckeia natriegens* (Payne *et al.*) Baumann *et al.* as a member of the genus *Vibrio*, as previously proposed by Webb and Payne. *Int J Syst Bacteriol* 28:315–317.
5. Moran MA, Buchan A, González JM, Heidelberg JF, Whitman WB, Klene RP, Henriksen JR, King GM, Belas R, Fuqua C, Brinkac L, Lewis M, Johri S, Weaver B, Pai G, Elsen JA, Rahe E, Sheldon WM, Ye W, Miller TR, Carlton J, Rasko DA, Paulsen IT, Ren Q, Daugherty SC, Deboy RT, Dodson RJ, Durkin AS, Madupu R, Nelson WC, Sullivan SA, Rosovitz MJ, Haft DH, Selengut J, Ward N. 2004. Genome sequence of *Silicibacter pomeroyi* reveals adaptations to the marine environment. *Nature* 432:910–913.
6. González JM, Covert JS, Whitman WB, Henriksen JR, Mayer F, Scharf B, Schmitt R, Buchan A, Fuhrman JA, Kiene RP, Moran MA. 2003. *Silicibacter pomeroyi* sp. nov. and *Roseovarius nubinhibens* sp. nov., dimethylsulfoniopropionate-demethylating bacteria from marine environments. *Int J Syst Evol Microbiol* 53:1261–1269.
7. Buchan A, Collier LS, Neidle EL, Moran MA. 2000. Key aromatic-ring-cleaving enzyme, protocatechuate 3,4-dioxygenase, in the ecologically important marine *Roseobacter* lineage. *Appl Environ Microbiol* 66:4662–4672.
8. Slightom RN, Buchan A. 2009. Surface colonization by marine *Roseobacters*: Integrating genotype and phenotype. *Appl Environ Microbiol* 75:6027–6037.
9. Moran MA, Belas R, Schell MA, González JM, Sun F, Sun S, Binder BJ, Edmonds J, Ye W, Orcutt B, Howard EC, Meile C, Palefsky W, Goesmann A, Ren Q, Paulsen I, Ulrich LE, Thompson LS, Saunders E, Buchan A. 2007. Ecological genomics of marine *Roseobacters*. *Appl Environ Microbiol* 73:4559–4569.
10. Schäfer H, McDonald IR, Nightingale PD, Murrell JC. 2005. Evidence for the presence of a CmuA methyltransferase pathway in novel marine methyl halide-oxidizing bacteria. *Environ Microbiol* 7:839–852.

11. Buchan A, Neidle EL, Moran MA. 2004. Diverse organization of genes of the  $\beta$ -ketoacid pathway in members of the marine *Roseobacter* lineage. *Appl Environ Microbiol* 70:1658–1668.
12. Ankrah NYD, Lane T, Budinoff CR, Hadden MK, Buchan A. 2014. Draft genome sequence of *Sulfitobacter* sp. CB2047, a member of the *Roseobacter* clade of marine bacteria, isolated from an *Emiliania huxleyi* bloom. *Genome Announc* 2.
13. Liang C, Huang Y, Wang H. 2019. *pahE*, a functional marker gene for polycyclic aromatic hydrocarbon-degrading bacteria. *Appl Environ Microbiol* 85.
14. Liang C, Ye Q, Huang Y, Wang Y, Zhang Z, Wang H. 2022. Shifts of the new functional marker gene (*pahE*) of polycyclic aromatic hydrocarbons (PAHs) degrading bacterial population and its relationship with PAHs biodegradation. *J Hazard Mater* 437.
15. Takizawa N, Iida T, Sawada T, Yamauchi K, Wang YW, Fukuda M, Kiyohara H. 1999. Nucleotide sequences and characterization of genes encoding naphthalene upper pathway of *Pseudomonas aeruginosa* PaK1 and *Pseudomonas putida* OUS82. *J Biosci Bioeng* 87:721–731.
16. Kim S-J, Song J, Kweon O, Holland RD, Kim D-W, Kim J, Yu L-R, Cerniglia CE. 2012. Functional robustness of a polycyclic aromatic hydrocarbon metabolic network examined in a *nidA* aromatic ring-hydroxylating oxygenase mutant of *Mycobacterium vanbaalenii* PYR-1. *Appl Environ Microbiol* 78:3715.
17. Dehmel U, Engesser KH, Timmis KN, Dwyer DF. 1995. Cloning, nucleotide sequence, and expression of the gene encoding a novel dioxygenase involved in metabolism of carboxydiphenyl ethers in *Pseudomonas pseudoalcaligenes* POB310. *Archives of Microbiology* 195 163:1 163:35–41.
18. Urata M, Miyakoshi M, Kai S, Maeda K, Habe H, Omori T, Yamane H, Nojiri H. 2004. Transcriptional regulation of the ant operon, encoding two-component anthranilate 1,2-dioxygenase, on the carbazole-degradative plasmid pCAR1 of *Pseudomonas resinovorans* strain CA10. *J Bacteriol* 186:6815–6823.
19. Kiyohara H, Torigoe S, Kaida N, Asaki T, Iida T. 1994. Cloning and characterization of a chromosomal gene cluster, *pah*, that encodes the upper pathway for phenanthrene and naphthalene utilization by *Pseudomonas putida* OUS82. *J Bacteriol* 176:2439–2443.
20. McKay DB, Seeger M, Zielinski M, Hofer B, Timmis KN. 1997. Heterologous expression of biphenyl dioxygenase-encoding genes from a gram-positive broad-spectrum polychlorinated biphenyl degrader and characterization of chlorobiphenyl oxidation by the gene products. *J Bacteriol* 179:1924–1930.
21. Fuenmayor SL, Wild M, Boyes AL, Williams PA. 1998. A gene cluster encoding steps in conversion of naphthalene to gentisate in *Pseudomonas* sp. strain U2. *J Bacteriol* 180:2522–2530.

22. Overhage J, Priefert H, Steinbüchel A. 1999. Biochemical and genetic analyses of ferulic acid catabolism in *Pseudomonas* sp. strain HR199. *Appl Environ Microbiol* 65:4837–4847.
23. Tsagogiannis E, Vandera E, Primikyri A, Asimakoula S, Tzakos AG, Gerothanassis IP, Koukkou AI. 2021. Characterization of protocatechuate 4,5-dioxygenase from *Pseudarthrobacter phenanthrenivorans* Sphe3 and *in situ* reaction monitoring in the NMR tube. *Int J Mol Sci* 22.
24. Neidle EL, Ornston LN. 1986. Cloning and expression of *Acinetobacter calcoaceticus* catechol 1,2-dioxygenase structural gene *catA* in *Escherichia coli*. *J Bacteriol* 168:815–820.
25. Le TT, Eymann C, Albrecht D, Sietmann R, Schauer F, Hecker M, Antelmann H. 2006. Differential gene expression in response to phenol and catechol reveals different metabolic activities for the degradation of aromatic compounds in *Bacillus subtilis*. *Environ Microbiol* 8:1408–1427.
