# Supplementary material for: Evidence for novel polycyclic aromatic hydrocarbon degradation pathways in culturable marine isolates
Source: PubMed Central journal article supplement (PMC10783047; doi:10.1128/spectrum.03409-23), 2023-12-12
Supplement: spectrum.03409-23-s0002.pdf [file spectrum.03409-23-s0002.pdf]

**Table S1:** Marine strains used in this study.

| <b>Bacteria name</b>                     | <b>Taxa</b>                | <b>Colony Morphology</b>            | <b>Genome Sequence Available?</b> | <b>16S rRNA Gene Accession Number</b> | <b>WGS Accession</b> | <b>Isolation Site</b>                                                                 |
|------------------------------------------|----------------------------|-------------------------------------|-----------------------------------|---------------------------------------|----------------------|---------------------------------------------------------------------------------------|
| <i>Marinobacterium georgiense</i>        | Gamma-Proteobacteria       | small, circular, translucent, white | Yes                               | U58339.1                              | NZ_CP022297.1        | Coastal Georgia (USA) seawater by enrichment with lignocellulose from a pulp mill (1) |
| <i>Bacillus-Clostridium</i> strain SE165 | Bacillus-Clostridium group | Large, orange colonies              | No                                | AY038905.1                            | N/A                  | <i>Spartina</i> leaves; Skidaway Island, Georgia (USA) (2)                            |
| <i>Bacillus-Clostridium</i> strain SE98  | Bacillus-Clostridium group | Large, white flat colonies          | No                                | AY038926.1                            | N/A                  | <i>Spartina</i> leaves; Skidaway Island, Georgia (USA) (2)                            |
| <i>Alteromonas macleodii</i> strain EZ55 | Gamma-Proteobacteria       | Medium, white, flat colonies        | Yes                               | EU704114                              | NZ_CABDXN010000001.1 | Isolated from a Prochlorococcus strain MIT 9215 lab culture (3)                       |
| <i>Vibrio natriegens</i> ATCC 14048      | Gamma-Proteobacteria       | Large, beige, flat colonies         | Yes                               | NR_117890.1                           | ASM145625v1          | Salt marsh sediment; Sapelo Island, Georgia (USA) (4)                                 |
| <i>Rhodospirillaceae</i> strain EZ35     | Alpha-proteobacteria       | Medium, beige, flat colonies        | No                                | AF493974                              | N/A                  | Isolated from a Prochlorococcus strain MED4 lab culture (3)                           |
| <i>Flavobacteriaceae</i> strain EZ40     | Bacteroidetes              | small, flat, yellow colonies        | No                                | EU591706                              | N/A                  | Isolated from a Prochlorococcus strain MIT 9312 lab culture (3)                       |
| <i>Alcanivorax</i> sp. strain EZ46       | Gamma-Proteobacteria       | Slow grower, small, white colonies  | No                                | EU591711                              | N/A                  | Isolated from a Prochlorococcus strain NATL2A lab culture (3, 5)                      |

|                                               |                          |                                                              |     |                    |                  |                                                                                                                                              |
|-----------------------------------------------|--------------------------|--------------------------------------------------------------|-----|--------------------|------------------|----------------------------------------------------------------------------------------------------------------------------------------------|
| <i>Ruegeria pomeroyi</i><br>DSS-3             | Alpha-<br>proteobacteria | Small, beige<br>(turns dark<br>brown),<br>raised<br>colonies | Yes | NR_028727          | NC_003911.12     | Coastal seawater;<br>Sapelo Island,<br>Georgia (USA), via<br>enrichment on<br>DMSP (6)                                                       |
| <i>Citricella</i> sp. SE45                    | Alpha-<br>proteobacteria | Medium,<br>mucoid,<br>whiteish-<br>yellow<br>colonies        | Yes | AF388308           | ACNW0000000.1    | <i>Spartina alterniflora</i><br>(smooth cordgrass)<br>detritus; southeastern<br>US salt marshes off<br>Skidaway Island,<br>Georgia (USA) (2) |
| <i>Sagittula stellata</i> E-37                | Alpha-<br>proteobacteria | Small, white,<br>raised<br>colonies                          | Yes | NR_026016          | NZ_AAYA0000000.1 | Coastal Georgia<br>(USA) seawater by<br>enrichment with<br>lignocellulose from a<br>pulp mill (7)                                            |
| <i>Sulfitobacter</i> sp. EE-36                | Alpha-<br>proteobacteria | Small, white<br>colonies with<br>orange center               | Yes | AF007254           | GCA_000152605.1  | Salt marsh; Sapelo<br>Island, Georgia<br>(USA) (7)                                                                                           |
| <i>Sulfitobacter</i> sp. NAS-<br>14.1         | Alpha-<br>proteobacteria | Small, white<br>colonies                                     | Yes | 642973159<br>(IMG) | NZ_AALZ0000000.1 | Surface waters in<br>North Atlantic<br>Ocean via<br>enrichment on<br>DMSP (8)                                                                |
| <i>Ruegeria</i> sp. TM1040                    | Alpha-<br>proteobacteria | Small,<br>yellow<br>colonies                                 | Yes | 640715081<br>(IMG) | NC_008044.1      | Phycosphere of the<br>dinoflagellate<br><i>Pfiesteria piscicida</i><br>(9)                                                                   |
| <i>Roseovarius</i> sp. 217                    | Alpha-<br>proteobacteria | Tiny, white<br>colonies                                      | Yes | 642973074<br>(IMG) | NZ_AAMV0000000.1 | Surface waters near<br>Plymouth, England<br>enriched for growth<br>on methyl halide<br>(10)                                                  |
| <i>Roseovarius</i><br><i>nubinihibens</i> ISM | Alpha-<br>proteobacteria | Small,<br>orange<br>colonies                                 | Yes | AF098495.1         | GCF_000152625.1  | Surface waters of the<br>Caribbean Sea (6)                                                                                                   |

|                                      |                      |                                |     |            |                |                                                                                                                             |
|--------------------------------------|----------------------|--------------------------------|-----|------------|----------------|-----------------------------------------------------------------------------------------------------------------------------|
| Rhodobacterales strain Y4I           | Alpha-proteobacteria | Small, blue/white colonies     | Yes | AF388307.1 | ABXF00000000.1 | <i>Spartina alterniflora</i> (smooth cordgrass) detritus; southeastern salt marshes off Skidaway Island, Georgia (USA) (11) |
| <i>Sulfitobacter pontiacus</i> CB-D  | Alpha-proteobacteria | Small, white colonies          | Yes | JN121396   | IV89_000278    | <i>Emiliana huxleyi</i> bloom in Raunefjorden, Norway enriched for growth on DMSP (12)                                      |
| <i>Escherichia coli</i> DH5 $\alpha$ | Gamma-Proteobacteria | Medium, mucoid, white colonies | Yes | KC161283   | JRYM00000000.1 | N/A                                                                                                                         |
