# Supplementary material for: Evidence for novel polycyclic aromatic hydrocarbon degradation pathways in culturable marine isolates
Source: PubMed Central journal article supplement (PMC10783047; doi:10.1128/spectrum.03409-23), 2023-12-12
Supplement: spectrum.03409-23-s0003.pdf [file spectrum.03409-23-s0003.pdf]

**Table S2: Query sequences for protein identity searches**

| <b>Protein</b> | <b>Group</b>                    | <b>Query Strain Name</b>                          | <b>GenBank Accession Number/NCBI Reference Sequence Number</b> | <b>Reference</b>                                |
|----------------|---------------------------------|---------------------------------------------------|----------------------------------------------------------------|-------------------------------------------------|
| PahE-NP        | PAH Hydratase Aldolase          | <i>Novosphingobium pentaromativorans</i> US6-1    | AIT82654.1                                                     | Liang et al., 2019; Liang et al., 2022 (13, 14) |
| PahE-RO        | PAH Hydratase Aldolase          | <i>Rhodococcus opacus</i> B4                      | BAH47216                                                       | Liang et al., 2019; Liang et al., 2022 (13, 14) |
| PahE-MV        | PAH Hydratase Aldolase          | <i>Mycobacterium vanbaalenii</i> PYR-1            | ABM11319                                                       | Liang et al., 2019; Liang et al., 2022 (13, 14) |
| PahE-PA        | PAH Hydratase Aldolase          | <i>Pseudomonas aeruginosa</i> PaK1                | BAA12246.1                                                     | Takizawa et al., 1999 (15)                      |
| NidA           | Gram + PAH/Phthalate            | <i>Mycobacterium vanbaalenii</i> PYR-1            | AF249301.2                                                     | Kim et al., 2012 (16)                           |
| PobA           | I                               | <i>Pseudomonas pseudoalcaligenes</i> POB310       | CAA55400.1                                                     | Dehmel et al., 1995 (17)                        |
| AntA           | II                              | <i>Pseudomonas resinovorans</i> CA10              | WP_011077861.1                                                 | Urata et al., 2004 (18)                         |
| PahAc          | III                             | <i>Pseudomonas putida</i> OUS82                   | BAA20391.1                                                     | Kiyohara et al., 1994 (19)                      |
| BphA1          | IV                              | <i>Rhodococcus globerulus</i> P6                  | CAA56346.1                                                     | McKay et al., 1997 (20)                         |
| NagG           | Salicylate                      | <i>Ralstonia</i> sp. U2                           | AAD12607.1                                                     | Fuenmayor et al., 1995 (21)                     |
| PcaH           | Protocatechuate 3,4-Dioxygenase | <i>Pseudomonas</i> sp. Strain HR199               | CAB43484.1                                                     | Overhage et al., 1999 (22)                      |
| PcaA/LigB      | Protocatechuate 4,5-Dioxygenase | <i>Pseudarthrobacter phenanthrenivorans</i> Sphe3 | ADX75303.1                                                     | Tsagogiannis et al., 2021 (23)                  |
| CatA           | Catechol 1,2-Dioxygenase        | <i>Acinetobacter calcoaceticus</i>                | SUU57696.1                                                     | Neidle & Ornston, 1986 (24)                     |
| CatE/YfiE      | Catechol 2,3-Dioxygenase        | <i>Bacillus subtilis</i> 168                      | BAA09109.1                                                     | Thi Tam et al., 2006 (25)                       |
